# Supplementary material
Source: MDPI journal article supplement (https://www.mdpi.com/2313-0105/6/4/60)
Supplement: s1 [file s1]

# Supplementary

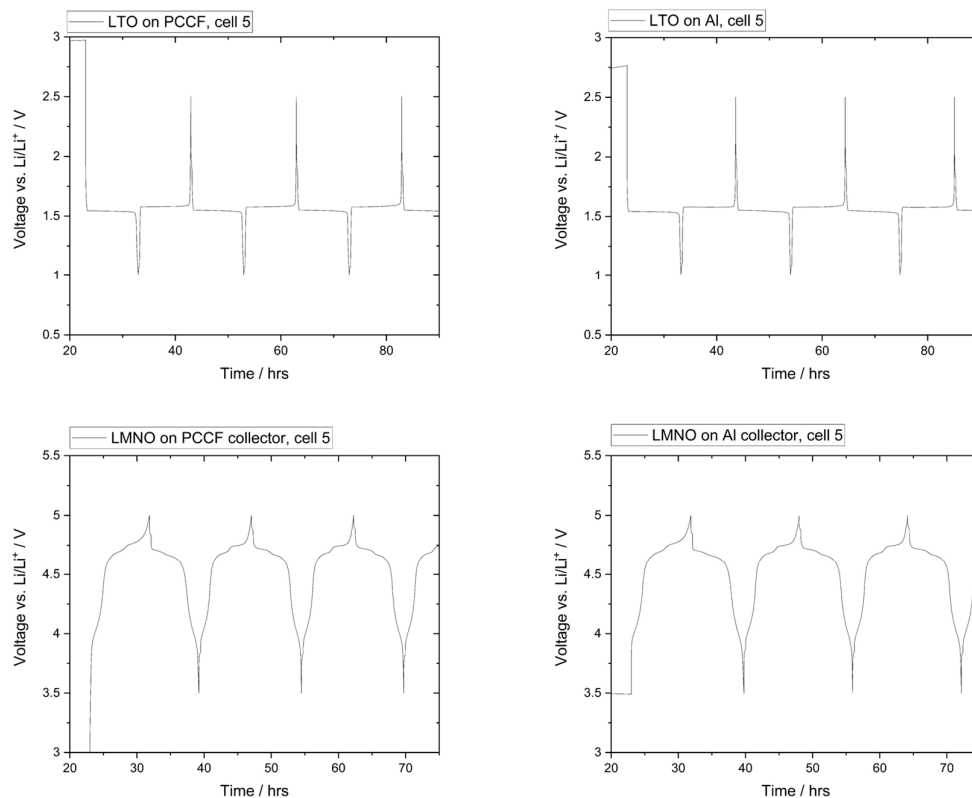

**Figure S1.** Voltage profiles of measured coin cells from Figure 9 and Figure 10 (first three cycles at 0.1C); Top left: LTO on PCCF, Top right LTO on Al-collector, Bottom left: LMNO on PCCF, Bottom right: LMNO on Al.

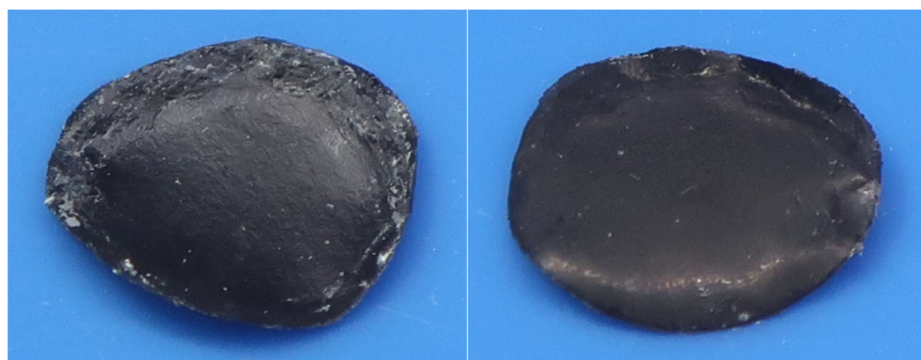

**Figure S2.** Post-mortem picture of PCCF-foil of a LTO cell after cycling test according to Figure 9; Left: PCCF C-primer side in contact to LTO electrode after cycling, Right: Backside of the PCCF after cycling of LTO in coin cell.

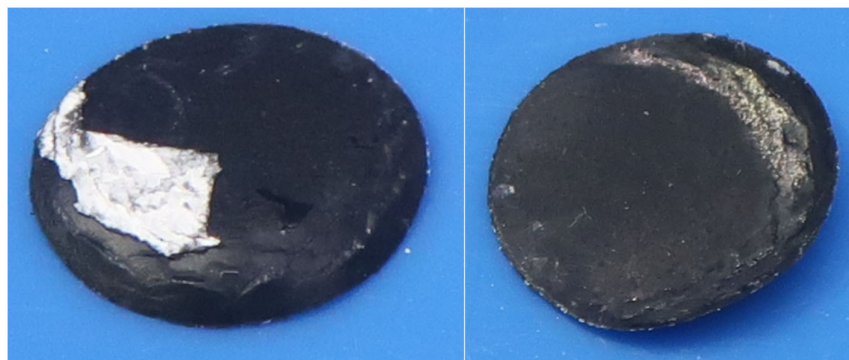

**Figure S3.** Post-mortem picture of PCCF-foil of a LMNO cell after cycling test according to Figure 10; Left: PCCF C-primer side in contact with LMNO electrode coating (some separator residue white) after cycling on coin cell; Right: Backside of the PCCF after cycling of LMNO in coin cell.
